# Supplementary material for: Analyzing Successful Aging and Longevity: Risk Factors and Health Promoters in 2020 Older Adults
Source: MDPI journal article supplement (doi:10.3390/ijerph19138178), 2022-07-04
Supplement: s1 [file s1]

# Supplementary Materials

**Table S1 Questionnaires**

|                                     |                                                                                                                                                                                                                                                                                                                                                                                                                                                                                                                                                                                                    |
|-------------------------------------|----------------------------------------------------------------------------------------------------------------------------------------------------------------------------------------------------------------------------------------------------------------------------------------------------------------------------------------------------------------------------------------------------------------------------------------------------------------------------------------------------------------------------------------------------------------------------------------------------|
| The Chronic Pain Questionnaire      | <ol style="list-style-type: none"> <li>1. Do you experience pain in everyday life (if not, stop here)?<br/>0 - no<br/>1 - yes</li> <li>2. Does pain limit your daily life?<br/>0 - no<br/>1 - yes</li> <li>3. Do you take a pain-relieving medication?<br/>0 - no<br/>1 – yes, rarely<br/>2 - yes, often</li> <li>4. Ask the patient to evaluate the severity of pain at the time of filling out the questionnaire on a scale from 1 to 10 (0 - no pain, 10 - unbearable pain): □□ points.</li> </ol>                                                                                              |
| The Anxiety Disorders Questionnaire | <ol style="list-style-type: none"> <li>1. Are you anxious most of the time?<br/>0 - no<br/>1 - yes</li> <li>2. Are you worrying too much about the little stuff?<br/>0 - no<br/>1 - yes</li> <li>3. Do you think of yourself as an anxious person?<br/>0 - no<br/>1 - yes</li> <li>4. Do you often feel nervous?<br/>0 - no<br/>1 - yes</li> <li>5. Do you often just have enough thoughts to be alarmed?<br/>0 - no<br/>1 - yes</li> </ol> <p>If the total score was 3 or more, the person was considered anxious. If the total score was less than 3, the person was not considered anxious.</p> |
| The Risk of falls Questionnaire     | <ol style="list-style-type: none"> <li>1. Have you fallen over the past year?<br/>0 - no<br/>1 - yes, once<br/>2 - yes, twice and more</li> <li>2. Where did you fall?<br/>0 – I did not<br/>1 - only at home<br/>2 - only in the street<br/>3 – both at home and in the street</li> <li>3. Have you ever had bone fractures as the results of falling from your own height?</li> </ol>                                                                                                                                                                                                            |

|                                       |                                                                                                                                                                                                                                                                                                                                                                                                                                                                                                                                                                                                                                                                                                                                                                 |
|---------------------------------------|-----------------------------------------------------------------------------------------------------------------------------------------------------------------------------------------------------------------------------------------------------------------------------------------------------------------------------------------------------------------------------------------------------------------------------------------------------------------------------------------------------------------------------------------------------------------------------------------------------------------------------------------------------------------------------------------------------------------------------------------------------------------|
|                                       | <p>0 - no<br/>1 - yes</p> <p>4. Have you undergone surgical procedures for the resulting bone fractures?<br/>0 - no<br/>1 - yes</p> <p>5. Did the fracture make you care-dependent?<br/>0 - no<br/>1 - yes, I was taken care of by a nurse<br/>2 - yes, I was taken care of by a family member</p>                                                                                                                                                                                                                                                                                                                                                                                                                                                              |
| The Sensory Deficit Questions         | <p>1. Do you have any limitations in your daily life due to loss of vision or hearing?<br/>0 - no<br/>1 - yes</p> <p>2. Do you wear glasses or contact lenses?<br/>0 - no<br/>1 - no, but I should<br/>2 - yes</p> <p>3. Without glasses, your eyesight is:<br/>0 - normal / good<br/>1 - not very good<br/>2 - bad</p> <p>4. When wearing glasses, your eyesight is:<br/>0 - I don't need the glasses<br/>1 - normal / good<br/>2 - not very good<br/>3 - bad</p> <p>5. Is your hearing:<br/>0 - good<br/>1 - slightly reduced<br/>2 - significantly reduced</p> <p>6. Do you use a hearing aid?<br/>0 - no, I do not need one<br/>1 - no, but would like to/should<br/>2 - yes</p>                                                                            |
| "Age is not a barrier" screening-test | <p>1. Have you lost 5 kg or more in the past 6 months? Yes/No</p> <p>2. Do you have any limitations in your daily life due to decreased vision or hearing? Yes/No</p> <p>3. Over the past year, have you had a fall-related injury or non-injury falls? Yes/No</p> <p>4. Have you been feeling depressed, sad, or anxious over the past weeks? Yes/No</p> <p>5. Do you have problems with memory, understanding, orientation, or the ability to plan? Yes/No</p> <p>6. Do you suffer from urinary incontinence? Yes/No</p> <p>7. Do you have difficulty moving inside the house or outside (walking up to 100 meters or 1 flight of stairs)? Yes/No</p> <p>The interpretation of the results:<br/>For each "Yes" 1 point is awarded. If the total score is:</p> |

|  |                                                                                                                                                                                                                          |
|--|--------------------------------------------------------------------------------------------------------------------------------------------------------------------------------------------------------------------------|
|  | <ul style="list-style-type: none"> <li>• 5 and more — senile asthenia is highly probable;</li> <li>• 3—4 points— senile asthenia is moderately probable;</li> <li>• 0—2 points — senile asthenia is unlikely.</li> </ul> |
|--|--------------------------------------------------------------------------------------------------------------------------------------------------------------------------------------------------------------------------|

**Table S2. List of factors**

|                     |                                                                                                                                                                                                                                                                                                                                                                                                                                                                                                                                                                                                                                                                                                                                                                                                                                                                                                   |
|---------------------|---------------------------------------------------------------------------------------------------------------------------------------------------------------------------------------------------------------------------------------------------------------------------------------------------------------------------------------------------------------------------------------------------------------------------------------------------------------------------------------------------------------------------------------------------------------------------------------------------------------------------------------------------------------------------------------------------------------------------------------------------------------------------------------------------------------------------------------------------------------------------------------------------|
| Long-term factors   | <ul style="list-style-type: none"> <li>• father's age when he died (and the reason if younger than 55)</li> <li>• mother's age when she died (and the reason if younger than 65)</li> <li>• family history of cognitive decline (memory loss)</li> </ul>                                                                                                                                                                                                                                                                                                                                                                                                                                                                                                                                                                                                                                          |
| Medium-term factors | <ul style="list-style-type: none"> <li>• marital status</li> <li>• parental status</li> <li>• total number of children</li> <li>• number of biological children</li> <li>• number of adopted children</li> <li>• education</li> <li>• disability</li> <li>• blood donation</li> <li>• type of menopause</li> <li>• age of menopause onset</li> <li>• number of pregnancies</li> <li>• age of the first childbirth</li> <li>• age of the last childbirth</li> <li>• height</li> <li>• age starting to work</li> <li>• age of retiring</li> <li>• type of job</li> <li>• occupation</li> <li>• income at the peak career</li> <li>• religion</li> <li>• age of taking up smoking</li> <li>• age of quitting smoking</li> <li>• residential area for the last 40 years</li> <li>• previously owning a pet previously (cat or dog)</li> <li>• hobby</li> <li>• life-long physical activity</li> </ul> |
| Short-term factors  | <ul style="list-style-type: none"> <li>• number of family members if living with the family</li> <li>• memory problems</li> <li>• clock-drawing test</li> <li>• frontal lobe disfunction</li> <li>• hippocampus disfunction</li> <li>• weight</li> <li>• BMI</li> <li>• waist circumference</li> </ul>                                                                                                                                                                                                                                                                                                                                                                                                                                                                                                                                                                                            |

|  |                                                                                                                                                                                                                                                                                                                                                                                                                                                                                                                                                                                                                                                                                                                                                                                                                                                                                                                                                                                                                                                                                                                                                                                                                                                                                                                                                                                                                                                                                                                                                                                                                                                                                                                                                                                                                                                                                                                                                                       |
|--|-----------------------------------------------------------------------------------------------------------------------------------------------------------------------------------------------------------------------------------------------------------------------------------------------------------------------------------------------------------------------------------------------------------------------------------------------------------------------------------------------------------------------------------------------------------------------------------------------------------------------------------------------------------------------------------------------------------------------------------------------------------------------------------------------------------------------------------------------------------------------------------------------------------------------------------------------------------------------------------------------------------------------------------------------------------------------------------------------------------------------------------------------------------------------------------------------------------------------------------------------------------------------------------------------------------------------------------------------------------------------------------------------------------------------------------------------------------------------------------------------------------------------------------------------------------------------------------------------------------------------------------------------------------------------------------------------------------------------------------------------------------------------------------------------------------------------------------------------------------------------------------------------------------------------------------------------------------------------|
|  | <ul style="list-style-type: none"> <li>• systolic pressure</li> <li>• diastolic pressure</li> <li>• heart rate</li> <li>• hypertension</li> <li>• atrial fibrillation</li> <li>• benign tumor</li> <li>• deep vein thrombosis in medical history</li> <li>• pulmonary embolism in medical history</li> <li>• tuberculosis</li> <li>• osteoarthritis</li> <li>• hip replacement</li> <li>• rheumatoid arthritis</li> <li>• osteoporosis</li> <li>• gout</li> <li>• Parkinson's disease</li> <li>• prostate disease</li> <li>• venous ulcer</li> <li>• age-related macular degeneration</li> <li>• gastroesophageal reflux disease</li> <li>• thyroid diseases</li> <li>• mental disorder</li> <li>• skin disorders</li> <li>• restless leg syndrome</li> <li>• essential tremor</li> <li>• sleep apnea</li> <li>• Insomnia Severity Index</li> <li>• aortic stenosis</li> <li>• brachiocephalic artery atherosclerosis</li> <li>• Charlson comorbidity index</li> <li>• self-perceived age</li> <li>• what one finds important/bothering</li> <li>• what one enjoys</li> <li>• what one feels is missing in life</li> <li>• "Age is not a barrier" «Age is not a barrier» screening-test</li> <li>• self-assessment of the quality of life</li> <li>• self-assessment of health</li> <li>• current employment status</li> <li>• receiving guests</li> <li>• going visiting</li> <li>• going out</li> <li>• using the Internet</li> <li>• communicating through phone/Internet</li> <li>• financial circumstances</li> <li>• church attendance</li> <li>• smoking status</li> <li>• cigarette smoke exposure</li> <li>• frequency of alcohol intake</li> <li>• amount of alcohol intake (beverage, quantity, ABV)</li> <li>• six or more alcoholic beverages at one time</li> <li>• physical activity</li> <li>• frequency of walks</li> <li>• duration of walks</li> <li>• physical activity limitation</li> <li>• reasons for physical activity limitation</li> </ul> |
|--|-----------------------------------------------------------------------------------------------------------------------------------------------------------------------------------------------------------------------------------------------------------------------------------------------------------------------------------------------------------------------------------------------------------------------------------------------------------------------------------------------------------------------------------------------------------------------------------------------------------------------------------------------------------------------------------------------------------------------------------------------------------------------------------------------------------------------------------------------------------------------------------------------------------------------------------------------------------------------------------------------------------------------------------------------------------------------------------------------------------------------------------------------------------------------------------------------------------------------------------------------------------------------------------------------------------------------------------------------------------------------------------------------------------------------------------------------------------------------------------------------------------------------------------------------------------------------------------------------------------------------------------------------------------------------------------------------------------------------------------------------------------------------------------------------------------------------------------------------------------------------------------------------------------------------------------------------------------------------|

|  |                                                                                                                                                                                                                                                                                                                                                                                                                                                                                                                                                                                                                                                                                                                                               |
|--|-----------------------------------------------------------------------------------------------------------------------------------------------------------------------------------------------------------------------------------------------------------------------------------------------------------------------------------------------------------------------------------------------------------------------------------------------------------------------------------------------------------------------------------------------------------------------------------------------------------------------------------------------------------------------------------------------------------------------------------------------|
|  | <ul style="list-style-type: none"> <li>• glaucoma</li> <li>• cataract</li> <li>• vision with glasses</li> <li>• vision without glasses</li> <li>• hearing</li> <li>• urinary incontinence while coughing, laughing, sneezing, picking up weights</li> <li>• urinary incontinence on the way to the bathroom</li> <li>• faecal incontinence</li> <li>• MMSE</li> <li>• SPPB</li> <li>• cancer</li> <li>• CVD in anamnesis</li> <li>• diabetes type 2</li> <li>• chronic heart failure</li> <li>• chronic anemia</li> <li>• chronic obstructive pulmonary disease</li> <li>• Alzheimer's disease</li> <li>• number of aging-associated diseases</li> <li>• sleeping pattern</li> <li>• GDS-5</li> <li>• owning pets</li> <li>• hobby</li> </ul> |
|--|-----------------------------------------------------------------------------------------------------------------------------------------------------------------------------------------------------------------------------------------------------------------------------------------------------------------------------------------------------------------------------------------------------------------------------------------------------------------------------------------------------------------------------------------------------------------------------------------------------------------------------------------------------------------------------------------------------------------------------------------------|

**Table S3.** Associations between GSs and long-term, medium-term and short-term factors.

| Factor                                            | GS                       | Correlation coefficient | p-value                | n    |
|---------------------------------------------------|--------------------------|-------------------------|------------------------|------|
| Long-term factors (p-value <0.01)                 |                          |                         |                        |      |
| father's age when he died                         | Risk of falls            | -0.114                  | $1.95 \times 10^{-05}$ | 1529 |
|                                                   | Frontal lobe dysfunction | -0.082                  | $2.99 \times 10^{-03}$ | 1494 |
| Family history of cognitive decline (memory loss) | Incontinence             | 0.118                   | $8.21 \times 10^{-07}$ | 1798 |
|                                                   | Sarcopenia               | 0.082                   | $6.82 \times 10^{-04}$ | 1588 |
|                                                   | Orthostatic hypotension  | 0.108                   | $1.03 \times 10^{-04}$ | 1238 |
|                                                   | Depression               | 0.192                   | $6.35 \times 10^{-17}$ | 1751 |
|                                                   | Risk of malnutrition     | 0.134                   | $1.04 \times 10^{-07}$ | 1625 |
|                                                   | Cognitive impairment     | 0.168                   | $1.28 \times 10^{-12}$ | 1718 |
|                                                   | Frontal lobe dysfunction | 0.184                   | $3.57 \times 10^{-15}$ | 1739 |
|                                                   | Anxiety disorder         | 0.115                   | $1.09 \times 10^{-04}$ | 1280 |

|                                                     |                          |        |                        |      |
|-----------------------------------------------------|--------------------------|--------|------------------------|------|
|                                                     | Dependence in ADL        | 0.079  | $1.82 \times 10^{-03}$ | 1754 |
|                                                     | Polypragmasia            | 0.093  | $1.14 \times 10^{-04}$ | 1645 |
| Medium-term factors (p-value $<1.7 \cdot 10^{-3}$ ) |                          |        |                        |      |
| age of retiring                                     | Frontal lobe dysfunction | -0.13  | $4.10 \times 10^{-07}$ | 1680 |
|                                                     | Cognitive impairment     | -0.141 | $2.11 \times 10^{-06}$ | 1649 |
| age of menopause onset                              | Frontal lobe dysfunction | -0.309 | $5.19 \times 10^{-25}$ | 1095 |
|                                                     | Orthostatic hypotension  | -0.177 | $6.13 \times 10^{-07}$ | 791  |
|                                                     | Depression               | -0.153 | $1.07 \times 10^{-06}$ | 1096 |
|                                                     | Dependence in IADL       | 0.098  | $7.73 \times 10^{-04}$ | 1096 |
| age of the first childbirth                         | Cognitive impairment     | -0.111 | $3.70 \times 10^{-04}$ | 1031 |
| age of quitting smoking                             | Sensory deficit          | 0.213  | $1.57 \times 10^{-03}$ | 205  |
| age of starting to work                             | Frontal lobe dysfunction | -0.292 | $3.57 \times 10^{-37}$ | 1716 |
|                                                     | Chronic pain             | -0.135 | $1.68 \times 10^{-09}$ | 1763 |
|                                                     | Depression               | -0.126 | $1.15 \times 10^{-08}$ | 1723 |
|                                                     | Cognitive impairment     | -0.091 | $4.04 \times 10^{-05}$ | 1688 |
|                                                     | Risk of falls            | -0.088 | $6.03 \times 10^{-05}$ | 1762 |
|                                                     | Anxiety disorder         | -0.103 | $1.29 \times 10^{-04}$ | 1235 |
|                                                     | Risk of malnutrition     | -0.067 | $1.70 \times 10^{-03}$ | 1593 |
| disability                                          | Polypragmasia            | 0.106  | $3.84 \times 10^{-06}$ | 1768 |
|                                                     | Dependence in ADL        | 0.09   | $2.35 \times 10^{-05}$ | 1896 |
|                                                     | Incontinence             | 0.083  | $6.91 \times 10^{-05}$ | 1935 |
|                                                     | Risk of malnutrition     | 0.085  | $1.64 \times 10^{-04}$ | 1706 |

|                              |                          |        |                        |      |
|------------------------------|--------------------------|--------|------------------------|------|
|                              | Frailty                  | 0.076  | $1.24 \times 10^{-03}$ | 1940 |
| education                    | Cognitive impairment     | -0.228 | $1.85 \times 10^{-20}$ | 1854 |
|                              | Frontal lobe dysfunction | -0.164 | $2.70 \times 10^{-12}$ | 1883 |
|                              | Sarcopenia               | -0.085 | $1.93 \times 10^{-04}$ | 1692 |
|                              | Dependence in IADL       | -0.091 | $4.11 \times 10^{-04}$ | 1912 |
|                              | Polypragmasia            | 0.074  | $1.11 \times 10^{-03}$ | 1775 |
| previously owning a cat      | Chronic pain             | 0.179  | $2.11 \times 10^{-11}$ | 1446 |
|                              | Sarcopenia               | -0.127 | $1.10 \times 10^{-06}$ | 1307 |
| previously owning a dog      | Chronic pain             | 0.11   | $1.80 \times 10^{-05}$ | 1451 |
|                              | Sarcopenia               | -0.116 | $2.01 \times 10^{-05}$ | 1310 |
|                              | Risk of falls            | 0.108  | $2.86 \times 10^{-05}$ | 1459 |
|                              | Cognitive impairment     | -0.095 | $4.40 \times 10^{-04}$ | 1387 |
| hight                        | Polypragmasia            | 0.075  | $4.24 \times 10^{-04}$ | 1714 |
| hobby                        | Cognitive impairment     | -0.187 | $1.29 \times 10^{-12}$ | 1333 |
|                              | Chronic pain             | 0.178  | $1.87 \times 10^{-11}$ | 1391 |
|                              | Risk of falls            | 0.152  | $1.62 \times 10^{-08}$ | 1395 |
|                              | Sarcopenia               | -0.15  | $2.70 \times 10^{-08}$ | 1266 |
|                              | Risk of malnutrition     | -0.125 | $8.18 \times 10^{-06}$ | 1280 |
| income at the peak of career | Cognitive impairment     | -0.107 | $1.29 \times 10^{-03}$ | 1397 |
| number of pregnancies        | Chronic pain             | 0.114  | $5.00 \times 10^{-05}$ | 1274 |
|                              | Sarcopenia               | -0.038 | $1.08 \times 10^{-03}$ | 1147 |
| life-long physical activity  | Sarcopenia               | -0.225 | $1.73 \times 10^{-16}$ | 1259 |

|                  |                          |        |                        |      |
|------------------|--------------------------|--------|------------------------|------|
|                  | Chronic pain             | 0.199  | $6.79 \times 10^{-16}$ | 1383 |
|                  | Orthostatic hypotension  | 0.207  | $1.83 \times 10^{-10}$ | 960  |
|                  | Risk of falls            | 0.151  | $1.45 \times 10^{-09}$ | 1387 |
|                  | Dependence in IADL       | -0.16  | $1.29 \times 10^{-08}$ | 1368 |
|                  | Frontal lobe dysfunction | 0.133  | $3.91 \times 10^{-07}$ | 1341 |
|                  | Dependence in ADL        | -0.141 | $2.19 \times 10^{-05}$ | 1351 |
|                  | Risk of malnutrition     | -0.134 | $6.83 \times 10^{-05}$ | 1272 |
|                  | Sensory deficit          | -0.086 | $1.67 \times 10^{-03}$ | 1386 |
| religion         | Frontal lobe dysfunction | -0.136 | $5.48 \times 10^{-10}$ | 1848 |
|                  | Depression               | -0.102 | $2.13 \times 10^{-07}$ | 1852 |
|                  | Orthostatic hypotension  | -0.112 | $2.03 \times 10^{-04}$ | 1305 |
|                  | Risk of malnutrition     | -0.044 | $1.38 \times 10^{-03}$ | 1716 |
| residential area | Polypragmasia            | 0.127  | $1.35 \times 10^{-06}$ | 1422 |
| type of job      | Cognitive impairment     | -0.176 | $6.23 \times 10^{-16}$ | 1827 |
|                  | Dependence in IADL       | -0.088 | $4.76 \times 10^{-05}$ | 1884 |
|                  | Sarcopenia               | -0.091 | $1.44 \times 10^{-04}$ | 1674 |
| grip strength    | Sarcopenia               | -0.338 | $1.12 \times 10^{-46}$ | 1661 |
|                  | Risk of falls            | 0.082  | $5.59 \times 10^{-05}$ | 1787 |
|                  | Frontal lobe dysfunction | 0.084  | $7.05 \times 10^{-05}$ | 1737 |
|                  | Chronic pain             | 0.11   | $2.22 \times 10^{-07}$ | 1787 |
|                  | Dependence in IADL       | -0.085 | $1.09 \times 10^{-03}$ | 1762 |
|                  | Frailty                  | -0.111 | $5.89 \times 10^{-05}$ | 1793 |



| Short-term factors (p-value<5.6 · 10 <sup>-4</sup> ) |                          |        |                          |      |
|------------------------------------------------------|--------------------------|--------|--------------------------|------|
| 6 or more alcoholic beverages at one time            | IADL                     | -0.127 | 3.55 x 10 <sup>-05</sup> | 1326 |
| age-related macular degeneration                     | Frontal lobe dysfunction | -0.129 | 1.21 x 10 <sup>-08</sup> | 1881 |
| Alzheimer's disease                                  | Dementia                 | 0.325  | 1.16 x 10 <sup>-36</sup> | 1489 |
|                                                      | Frontal lobe dysfunction | 0.229  | 1.30 x 10 <sup>-18</sup> | 1516 |
|                                                      | Orthostatic hypotension  | 0.076  | 7.57 x 10 <sup>-07</sup> | 1128 |
|                                                      | Frailty                  | 0.111  | 8.92 x 10 <sup>-05</sup> | 1525 |
|                                                      | Depression               | 0.106  | 2.01 x 10 <sup>-04</sup> | 1507 |
| atrial fibrillation                                  | Polypragmasia            | 0.195  | 2.08 x 10 <sup>-17</sup> | 1823 |
| benign tumor                                         | Chronic pain             | 0.08   | 1.76 x 10 <sup>-05</sup> | 1924 |
| BMI                                                  | Risk of malnutrition     | -0.117 | 1.41 x 10 <sup>-07</sup> | 1765 |
|                                                      | Polypragmasia            | 0.1    | 2.41 x 10 <sup>-05</sup> | 1701 |
| brachiocephalic artery atherosclerosis               | Polypragmasia            | 0.146  | 5.40 x 10 <sup>-10</sup> | 1802 |
|                                                      | Depression               | 0.087  | 3.43 x 10 <sup>-05</sup> | 1895 |
|                                                      | Frailty                  | -0.088 | 1.82 x 10 <sup>-04</sup> | 1964 |
|                                                      | Frontal lobe dysfunction | 0.078  | 3.59 x 10 <sup>-04</sup> | 1882 |
| cataract                                             | Frontal lobe dysfunction | 0.148  | 8.53 x 10 <sup>-10</sup> | 1886 |
|                                                      | Chronic pain             | 0.121  | 8.75 x 10 <sup>-08</sup> | 1909 |
|                                                      | Sarcopenia               | -0.095 | 1.57 x 10 <sup>-05</sup> | 1682 |
|                                                      | Risk of falls            | 0.096  | 3.90 x 10 <sup>-05</sup> | 1933 |
|                                                      | Orthostatic hypotension  | 0.114  | 8.21 x 10 <sup>-05</sup> | 1302 |
|                                                      | Depression               | 0.085  | 4.10 x 10 <sup>-04</sup> | 1893 |

|                            |                                |        |                        |      |
|----------------------------|--------------------------------|--------|------------------------|------|
| Charlson comorbidity index | Dementia                       | 0.275  | $7.31 \times 10^{-34}$ | 1825 |
|                            | Frontal lobe dysfunction       | 0.193  | $6.11 \times 10^{-17}$ | 1844 |
|                            | Depression                     | 0.186  | $2.15 \times 10^{-16}$ | 1847 |
|                            | Polypragmasia                  | 0.185  | $4.22 \times 10^{-15}$ | 1752 |
|                            | Frailty                        | 0.116  | $1.91 \times 10^{-07}$ | 1905 |
|                            | Urinary or faecal incontinence | 0.102  | $2.31 \times 10^{-06}$ | 1902 |
|                            | Risk of malnutrition           | 0.11   | $3.04 \times 10^{-06}$ | 1700 |
|                            | Barthel index                  | 0.099  | $4.25 \times 10^{-06}$ | 1863 |
|                            | Orthostatic hypotension        | 0.128  | $5.07 \times 10^{-06}$ | 1276 |
|                            | Anxiety disorder               | 0.125  | $1.32 \times 10^{-05}$ | 1267 |
|                            | IADL                           | 0.096  | $2.65 \times 10^{-05}$ | 1867 |
|                            | Chronic pain                   | 0.091  | $4.81 \times 10^{-05}$ | 1848 |
| chronic heart failure      | Frontal lobe dysfunction       | -0.185 | $5.22 \times 10^{-16}$ | 1912 |
|                            | IADL                           | 0.139  | $4.58 \times 10^{-10}$ | 1956 |
|                            | Polypragmasia                  | 0.145  | $5.43 \times 10^{-10}$ | 1824 |
|                            | Orthostatic hypotension        | -0.141 | $4.22 \times 10^{-07}$ | 1310 |
|                            | Sarcopenia                     | 0.116  | $7.94 \times 10^{-07}$ | 1708 |
|                            | Frailty                        | 0.091  | $2.13 \times 10^{-05}$ | 1996 |
|                            | Risk of malnutrition           | 0.098  | $2.18 \times 10^{-05}$ | 1757 |
|                            | Urinary or faecal incontinence | 0.084  | $1.21 \times 10^{-04}$ | 1992 |
|                            | Barthel index                  | 0.082  | $1.63 \times 10^{-04}$ | 1946 |
| church attendance          | Frontal lobe dysfunction       | -0.126 | $4.73 \times 10^{-09}$ | 1852 |

|                                 |                                |        |                         |      |
|---------------------------------|--------------------------------|--------|-------------------------|------|
|                                 | Depression                     | -0.112 | $3.14 \times 10^{-08}$  | 1857 |
|                                 | Dementia                       | -0.094 | $1.08 \times 10^{-06}$  | 1823 |
|                                 | Chronic pain                   | 0.098  | $2.63 \times 10^{-04}$  | 1909 |
| clock-drawing test              | Dementia                       | -0.544 | $3.85 \times 10^{-108}$ | 1508 |
|                                 | Frontal lobe dysfunction       | -0.314 | $7.71 \times 10^{-33}$  | 1503 |
|                                 | Risk of malnutrition           | -0.227 | $7.38 \times 10^{-14}$  | 1366 |
|                                 | Frailty                        | -0.211 | $3.44 \times 10^{-12}$  | 1528 |
|                                 | Barthel index                  | -0.185 | $4.85 \times 10^{-09}$  | 1496 |
|                                 | Sarcopenia                     | -0.167 | $1.01 \times 10^{-08}$  | 1315 |
|                                 | Urinary or faecal incontinence | -0.154 | $7.59 \times 10^{-07}$  | 1525 |
|                                 | IADL                           | -0.143 | $1.33 \times 10^{-06}$  | 1503 |
|                                 | Depression                     | -0.132 | $6.25 \times 10^{-05}$  | 1488 |
|                                 | Polypragmasia                  | 0.104  | $7.12 \times 10^{-05}$  | 1417 |
| communication by phone/Internet | Dementia                       | -0.272 | $1.90 \times 10^{-30}$  | 1875 |
|                                 | IADL                           | -0.147 | $8.14 \times 10^{-10}$  | 1943 |
|                                 | Frontal lobe dysfunction       | -0.131 | $1.89 \times 10^{-07}$  | 1904 |
|                                 | Risk of malnutrition           | -0.136 | $2.71 \times 10^{-07}$  | 1746 |
|                                 | Frailty                        | -0.132 | $3.05 \times 10^{-07}$  | 1975 |
|                                 | Barthel index                  | -0.117 | $4.28 \times 10^{-06}$  | 1929 |
|                                 | Polypragmasia                  | 0.105  | $1.13 \times 10^{-05}$  | 1798 |
|                                 | Sarcopenia                     | -0.1   | $1.45 \times 10^{-04}$  | 1698 |
| currently employed              | IADL                           | -0.122 | $2.57 \times 10^{-07}$  | 1946 |

|                                           |                                |        |                        |      |
|-------------------------------------------|--------------------------------|--------|------------------------|------|
|                                           | Frailty                        | -0.097 | $1.20 \times 10^{-04}$ | 1983 |
|                                           | Barthel index                  | -0.097 | $4.47 \times 10^{-04}$ | 1935 |
| CVD in family history                     | Polypragmasia                  | 0.178  | $2.96 \times 10^{-14}$ | 1823 |
|                                           | Frontal lobe dysfunction       | -0.136 | $1.43 \times 10^{-08}$ | 1906 |
|                                           | IADL                           | 0.088  | $3.10 \times 10^{-05}$ | 1952 |
| diabetes type 2                           | Polypragmasia                  | 0.119  | $3.38 \times 10^{-07}$ | 1821 |
| Frequency of drinking alcoholic beverages | Sarcopenia                     | -0.14  | $1.21 \times 10^{-07}$ | 1324 |
|                                           | IADL                           | -0.129 | $7.58 \times 10^{-06}$ | 1439 |
|                                           | Barthel index                  | -0.137 | $9.12 \times 10^{-05}$ | 1427 |
| essential tremor                          | Orthostatic hypotension        | 0.178  | $3.02 \times 10^{-10}$ | 1255 |
|                                           | Depression                     | 0.124  | $6.29 \times 10^{-07}$ | 1792 |
|                                           | Frontal lobe dysfunction       | 0.098  | $9.51 \times 10^{-05}$ | 1795 |
| faecal incontinence                       | Urinary or faecal incontinence | 0.398  | $2.25 \times 10^{-19}$ | 493  |
|                                           | Dementia                       | 0.333  | $3.81 \times 10^{-13}$ | 459  |
|                                           | Polypragmasia                  | -0.283 | $5.22 \times 10^{-08}$ | 378  |
|                                           | Depression                     | -0.195 | $1.16 \times 10^{-05}$ | 490  |
|                                           | Barthel index                  | 0.176  | $2.55 \times 10^{-04}$ | 484  |
|                                           | IADL                           | 0.163  | $3.84 \times 10^{-04}$ | 480  |
|                                           | Frailty                        | 0.174  | $4.07 \times 10^{-04}$ | 494  |
| frequency of walks                        | Risk of malnutrition           | -0.148 | $9.42 \times 10^{-10}$ | 1757 |
|                                           | Dementia                       | -0.129 | $3.93 \times 10^{-08}$ | 1883 |
|                                           | Frailty                        | -0.104 | $4.90 \times 10^{-06}$ | 1985 |

|                                 |                                |        |                          |      |
|---------------------------------|--------------------------------|--------|--------------------------|------|
| frontal lobe disorder           | Frontal lobe dysfunction       | 0.859  | 0.00 x 10+00             | 1803 |
|                                 | Dementia                       | 0.386  | 1.41 x 10 <sup>-59</sup> | 1745 |
|                                 | Depression                     | 0.291  | 1.90 x 10 <sup>-33</sup> | 1760 |
|                                 | Orthostatic hypotension        | 0.216  | 2.11 x 10 <sup>-14</sup> | 1253 |
|                                 | Frailty                        | 0.154  | 3.11 x 10 <sup>-09</sup> | 1802 |
|                                 | Risk of malnutrition           | 0.145  | 4.91 x 10 <sup>-08</sup> | 1636 |
|                                 | Anxiety disorder               | 0.14   | 1.29 x 10 <sup>-06</sup> | 1239 |
|                                 | Chronic pain                   | 0.099  | 6.30 x 10 <sup>-05</sup> | 1795 |
|                                 | Barthel index                  | 0.093  | 4.49 x 10 <sup>-04</sup> | 1760 |
| gastroesophageal reflux disease | Dementia                       | -0.099 | 1.31 x 10 <sup>-05</sup> | 1873 |
| GDS-5                           | Depression                     | 0.851  | 0.00 x 10+00             | 1840 |
|                                 | Anxiety disorder               | 0.385  | 6.15 x 10 <sup>-45</sup> | 1309 |
|                                 | Frontal lobe dysfunction       | 0.306  | 1.88 x 10 <sup>-37</sup> | 1773 |
|                                 | Risk of malnutrition           | 0.312  | 6.50 x 10 <sup>-35</sup> | 1631 |
|                                 | Dementia                       | 0.224  | 9.08 x 10 <sup>-19</sup> | 1746 |
|                                 | Chronic pain                   | 0.203  | 2.11 x 10 <sup>-16</sup> | 1783 |
|                                 | Barthel index                  | 0.193  | 2.88 x 10 <sup>-14</sup> | 1794 |
|                                 | Orthostatic hypotension        | 0.183  | 4.02 x 10 <sup>-11</sup> | 1243 |
|                                 | Risk of falls                  | 0.148  | 6.18 x 10 <sup>-09</sup> | 1802 |
|                                 | Urinary or faecal incontinence | 0.144  | 1.30 x 10 <sup>-08</sup> | 1832 |
|                                 | Frailty                        | 0.124  | 4.09 x 10 <sup>-06</sup> | 1837 |
|                                 | IADL                           | 0.101  | 8.62 x 10 <sup>-05</sup> | 1802 |

|                           |                                |        |                        |      |
|---------------------------|--------------------------------|--------|------------------------|------|
| going out                 | Risk of malnutrition           | -0.333 | $1.95 \times 10^{-40}$ | 1745 |
|                           | IADL                           | -0.263 | $6.20 \times 10^{-30}$ | 1935 |
|                           | Barthel index                  | -0.251 | $3.13 \times 10^{-23}$ | 1922 |
|                           | Frailty                        | -0.226 | $4.41 \times 10^{-20}$ | 1966 |
|                           | Dementia                       | -0.223 | $1.09 \times 10^{-18}$ | 1866 |
|                           | Urinary or faecal incontinence | -0.178 | $4.74 \times 10^{-12}$ | 1965 |
|                           | Depression                     | -0.168 | $2.00 \times 10^{-11}$ | 1900 |
|                           | Sarcopenia                     | -0.148 | $5.22 \times 10^{-10}$ | 1696 |
|                           | Frontal lobe dysfunction       | -0.119 | $2.96 \times 10^{-06}$ | 1893 |
| receiving guests          | Depression                     | -0.15  | $4.75 \times 10^{-11}$ | 1851 |
|                           | Frontal lobe dysfunction       | -0.138 | $1.89 \times 10^{-09}$ | 1842 |
| self-assessment of health | Depression                     | -0.393 | $5.22 \times 10^{-61}$ | 1684 |
|                           | Frontal lobe dysfunction       | -0.312 | $9.53 \times 10^{-38}$ | 1675 |
|                           | Frailty                        | -0.22  | $1.61 \times 10^{-18}$ | 1711 |
|                           | Dementia                       | -0.198 | $2.29 \times 10^{-14}$ | 1637 |
|                           | Barthel index                  | -0.194 | $4.01 \times 10^{-14}$ | 1674 |
|                           | Risk of malnutrition           | -0.198 | $9.67 \times 10^{-14}$ | 1571 |
|                           | Orthostatic hypotension        | -0.192 | $7.14 \times 10^{-12}$ | 1238 |
|                           | Risk of falls                  | -0.163 | $1.22 \times 10^{-10}$ | 1711 |
|                           | Chronic pain                   | -0.16  | $1.61 \times 10^{-10}$ | 1708 |
|                           | Urinary or faecal incontinence | -0.124 | $2.48 \times 10^{-06}$ | 1709 |
|                           | IADL                           | -0.098 | $1.68 \times 10^{-04}$ | 1680 |

|                         |                                |        |                        |      |
|-------------------------|--------------------------------|--------|------------------------|------|
| hearing                 | Sensory deficit                | 0.423  | $4.52 \times 10^{-84}$ | 1962 |
|                         | Chronic pain                   | 0.118  | $8.01 \times 10^{-08}$ | 1947 |
|                         | Barthel index                  | 0.116  | $1.06 \times 10^{-07}$ | 1912 |
|                         | IADL                           | 0.118  | $4.99 \times 10^{-07}$ | 1922 |
|                         | Urinary or faecal incontinence | 0.101  | $2.61 \times 10^{-06}$ | 1957 |
|                         | Frailty                        | 0.094  | $1.65 \times 10^{-04}$ | 1959 |
|                         | Anxiety disorder               | 0.098  | $2.05 \times 10^{-04}$ | 1324 |
|                         | Risk of falls                  | 0.083  | $3.57 \times 10^{-04}$ | 1952 |
| hippocampus dysfunction | Dementia                       | 0.373  | $1.85 \times 10^{-51}$ | 1604 |
|                         | Frontal lobe dysfunction       | 0.327  | $2.43 \times 10^{-40}$ | 1647 |
|                         | Orthostatic hypotension        | 0.104  | $2.45 \times 10^{-12}$ | 1186 |
|                         | Depression                     | 0.181  | $9.13 \times 10^{-12}$ | 1626 |
|                         | Frailty                        | 0.13   | $2.48 \times 10^{-06}$ | 1650 |
|                         | Risk of malnutrition           | 0.112  | $1.00 \times 10^{-04}$ | 1514 |
|                         | Barthel index                  | 0.1    | $4.23 \times 10^{-04}$ | 1610 |
| hobby                   | Dementia                       | -0.253 | $1.27 \times 10^{-20}$ | 1341 |
|                         | Risk of malnutrition           | -0.199 | $6.68 \times 10^{-13}$ | 1291 |
|                         | Sarcopenia                     | -0.189 | $1.94 \times 10^{-11}$ | 1277 |
|                         | IADL                           | -0.144 | $1.43 \times 10^{-07}$ | 1386 |
|                         | Depression                     | -0.108 | $1.00 \times 10^{-04}$ | 1352 |
|                         | Frontal lobe dysfunction       | -0.101 | $3.11 \times 10^{-04}$ | 1361 |
|                         | Barthel index                  | -0.099 | $4.51 \times 10^{-04}$ | 1368 |

|                         |                                |        |                         |      |
|-------------------------|--------------------------------|--------|-------------------------|------|
| hypertension            | Frontal lobe dysfunction       | -0.135 | $1.90 \times 10^{-09}$  | 1910 |
|                         | Polypragmasia                  | 0.083  | $4.07 \times 10^{-04}$  | 1822 |
|                         | Frailty                        | 0.077  | $5.23 \times 10^{-04}$  | 1994 |
| Insomnia severity index | Depression                     | 0.319  | $1.65 \times 10^{-07}$  | 251  |
|                         | Sensory deficit                | 0.239  | $9.59 \times 10^{-05}$  | 246  |
| duration of walks       | Risk of malnutrition           | -0.325 | $8.40 \times 10^{-39}$  | 1754 |
|                         | IADL                           | -0.253 | $7.84 \times 10^{-28}$  | 1942 |
|                         | Barthel index                  | -0.248 | $7.95 \times 10^{-24}$  | 1932 |
|                         | Frailty                        | -0.223 | $4.48 \times 10^{-20}$  | 1978 |
|                         | Depression                     | -0.202 | $5.54 \times 10^{-17}$  | 1907 |
|                         | Dementia                       | -0.21  | $7.48 \times 10^{-17}$  | 1877 |
|                         | Sarcopenia                     | -0.172 | $4.02 \times 10^{-13}$  | 1706 |
|                         | Urinary or faecal incontinence | -0.172 | $5.88 \times 10^{-12}$  | 1977 |
| memory problems         | Risk of malnutrition           | 0.14   | $1.33 \times 10^{-08}$  | 1740 |
| memory problems         | Urinary or faecal incontinence | 0.128  | $1.99 \times 10^{-08}$  | 1955 |
| memory problems         | Sensory deficit                | 0.106  | $2.68 \times 10^{-06}$  | 1946 |
| memory problems         | Barthel index                  | 0.1    | $2.21 \times 10^{-05}$  | 1910 |
| memory problems         | IADL                           | 0.094  | $5.36 \times 10^{-05}$  | 1922 |
| memory problems         | Depression                     | 0.086  | $1.47 \times 10^{-04}$  | 1894 |
| memory problems         | Chronic pain                   | 0.086  | $2.71 \times 10^{-04}$  | 1942 |
| MMSE                    | Dementia                       | -0.718 | $9.99 \times 10^{-294}$ | 1904 |
| MMSE                    | Frontal lobe dysfunction       | -0.358 | $1.12 \times 10^{-54}$  | 1863 |



|                                     |                                |        |                        |      |
|-------------------------------------|--------------------------------|--------|------------------------|------|
| MMSE                                | Frailty                        | -0.226 | $8.33 \times 10^{-20}$ | 1902 |
| MMSE                                | Risk of malnutrition           | -0.232 | $8.05 \times 10^{-19}$ | 1689 |
| MMSE                                | Urinary or faecal incontinence | -0.178 | $7.05 \times 10^{-13}$ | 1899 |
| MMSE                                | Barthel index                  | -0.181 | $3.53 \times 10^{-12}$ | 1857 |
| MMSE                                | Orthostatic hypotension        | -0.169 | $9.62 \times 10^{-10}$ | 1280 |
| MMSE                                | IADL                           | -0.145 | $4.70 \times 10^{-09}$ | 1871 |
| MMSE                                | Polypragmasia                  | 0.14   | $5.47 \times 10^{-09}$ | 1733 |
| MMSE                                | Sarcopenia                     | -0.145 | $2.23 \times 10^{-08}$ | 1642 |
| MMSE                                | Depression                     | -0.127 | $2.09 \times 10^{-06}$ | 1846 |
| MMSE                                | Chronic pain                   | 0.083  | $2.78 \times 10^{-05}$ | 1851 |
| number of aging-associated diseases | Dementia                       | 0.167  | $1.48 \times 10^{-11}$ | 1465 |
|                                     | Polypragmasia                  | 0.124  | $3.77 \times 10^{-06}$ | 1381 |
|                                     | Risk of malnutrition           | 0.11   | $1.04 \times 10^{-05}$ | 1390 |
|                                     | Barthel index                  | 0.104  | $1.82 \times 10^{-05}$ | 1472 |
|                                     | Depression                     | 0.098  | $6.24 \times 10^{-05}$ | 1484 |
| osteoarthritis                      | Frontal lobe dysfunction       | -0.202 | $5.72 \times 10^{-20}$ | 1902 |
| osteoarthritis                      | Sarcopenia                     | 0.125  | $1.27 \times 10^{-07}$ | 1700 |
| osteoarthritis                      | Urinary or faecal incontinence | 0.123  | $1.83 \times 10^{-07}$ | 1981 |
| osteoarthritis                      | Barthel index                  | 0.124  | $2.01 \times 10^{-07}$ | 1937 |
| osteoarthritis                      | Polypragmasia                  | 0.121  | $2.87 \times 10^{-07}$ | 1819 |
| osteoarthritis                      | IADL                           | 0.107  | $5.44 \times 10^{-06}$ | 1946 |
| osteoarthritis                      | Sensory deficit                | 0.098  | $2.31 \times 10^{-05}$ | 1932 |

|                              |                                |        |                        |      |
|------------------------------|--------------------------------|--------|------------------------|------|
| osteoarthritis               | Chronic pain                   | 0.098  | $6.80 \times 10^{-05}$ | 1925 |
| osteoarthritis               | Dementia                       | -0.07  | $5.45 \times 10^{-04}$ | 1873 |
| osteoporosis                 | Risk of falls                  | 0.183  | $1.99 \times 10^{-14}$ | 1939 |
| osteoporosis                 | Chronic pain                   | 0.169  | $1.96 \times 10^{-12}$ | 1911 |
| osteoporosis                 | Depression                     | 0.126  | $5.83 \times 10^{-07}$ | 1899 |
| osteoporosis                 | Anxiety disorder               | 0.138  | $9.97 \times 10^{-06}$ | 1311 |
| physical activity            | Risk of malnutrition           | -0.324 | $3.31 \times 10^{-38}$ | 1752 |
| physical activity            | IADL                           | -0.263 | $7.41 \times 10^{-30}$ | 1943 |
| physical activity            | Dementia                       | -0.267 | $2.94 \times 10^{-27}$ | 1876 |
| physical activity            | Frailty                        | -0.251 | $3.75 \times 10^{-25}$ | 1978 |
| physical activity            | Barthel index                  | -0.256 | $4.00 \times 10^{-25}$ | 1934 |
| physical activity            | Depression                     | -0.225 | $1.06 \times 10^{-20}$ | 1909 |
| physical activity            | Urinary or faecal incontinence | -0.206 | $4.91 \times 10^{-17}$ | 1977 |
| physical activity            | Sarcopenia                     | -0.166 | $5.60 \times 10^{-12}$ | 1703 |
| physical activity            | Frontal lobe dysfunction       | -0.148 | $3.26 \times 10^{-09}$ | 1905 |
| physical activity limitation | Frailty                        | 0.217  | $4.98 \times 10^{-20}$ | 1928 |
| physical activity limitation | Barthel index                  | 0.211  | $1.84 \times 10^{-19}$ | 1884 |
| physical activity limitation | IADL                           | 0.197  | $4.64 \times 10^{-17}$ | 1896 |
| physical activity limitation | Depression                     | 0.173  | $1.61 \times 10^{-12}$ | 1863 |
| physical activity limitation | Sensory deficit                | 0.159  | $7.34 \times 10^{-12}$ | 1922 |
| physical activity limitation | Urinary or faecal incontinence | 0.137  | $8.99 \times 10^{-09}$ | 1927 |
| physical activity limitation | Chronic pain                   | 0.135  | $1.48 \times 10^{-08}$ | 1923 |

|                                        |                                |        |                        |      |
|----------------------------------------|--------------------------------|--------|------------------------|------|
| physical activity limitation           | Frontal lobe dysfunction       | 0.139  | $1.56 \times 10^{-08}$ | 1857 |
| physical activity limitation           | Risk of malnutrition           | 0.129  | $9.23 \times 10^{-07}$ | 1723 |
| physical activity limitation           | Depression                     | 0.213  | $2.72 \times 10^{-05}$ | 418  |
| physical activity limitation           | Frailty                        | 0.208  | $6.43 \times 10^{-05}$ | 421  |
| physical activity limitation           | Risk of falls                  | 0.093  | $1.77 \times 10^{-04}$ | 1927 |
| physical activity limitation           | Dementia                       | 0.096  | $3.39 \times 10^{-04}$ | 1828 |
| physical activity limitation           | IADL                           | 0.178  | $5.48 \times 10^{-04}$ | 412  |
| self-assessment of the quality of life | Depression                     | -0.288 | $2.44 \times 10^{-31}$ | 1688 |
| self-assessment of the quality of life | Dementia                       | -0.216 | $7.66 \times 10^{-17}$ | 1641 |
| self-assessment of the quality of life | Risk of malnutrition           | -0.197 | $8.49 \times 10^{-14}$ | 1573 |
| self-assessment of the quality of life | Frontal lobe dysfunction       | -0.181 | $1.48 \times 10^{-12}$ | 1679 |
| self-assessment of the quality of life | Frailty                        | -0.177 | $5.22 \times 10^{-12}$ | 1715 |
| self-assessment of the quality of life | Barthel index                  | -0.152 | $5.68 \times 10^{-09}$ | 1678 |
| self-assessment of the quality of life | Sarcopenia                     | -0.127 | $1.15 \times 10^{-06}$ | 1565 |
| self-assessment of the quality of life | Orthostatic hypotension        | -0.135 | $1.97 \times 10^{-06}$ | 1243 |
| self-assessment of the quality of life | IADL                           | -0.106 | $4.25 \times 10^{-05}$ | 1684 |
| restless leg syndrome                  | Chronic pain                   | 0.214  | $3.90 \times 10^{-19}$ | 1768 |
| restless leg syndrome                  | Anxiety disorder               | 0.231  | $1.45 \times 10^{-16}$ | 1301 |
| restless leg syndrome                  | Risk of falls                  | 0.157  | $3.83 \times 10^{-11}$ | 1772 |
| restless leg syndrome                  | Sarcopenia                     | -0.136 | $1.32 \times 10^{-07}$ | 1580 |
| restless leg syndrome                  | Depression                     | 0.106  | $8.67 \times 10^{-06}$ | 1722 |
| restless leg syndrome                  | Urinary or faecal incontinence | 0.095  | $1.46 \times 10^{-04}$ | 1775 |

|                                          |                                |       |                        |      |
|------------------------------------------|--------------------------------|-------|------------------------|------|
| rheumatoid arthritis                     | Polypragmasia                  | 0.083 | $3.24 \times 10^{-04}$ | 1816 |
| «Age is not a barrier”<br>screening-test | Urinary or faecal incontinence | 0.445 | $1.37 \times 10^{-86}$ | 1871 |
| “Age is not a barrier”<br>screening-test | Barthel index                  | 0.384 | $4.84 \times 10^{-59}$ | 1833 |
| «Age is not a barrier”<br>screening-test | Depression                     | 0.358 | $2.31 \times 10^{-52}$ | 1842 |
| «Age is not a barrier”<br>screening-test | Risk of falls                  | 0.307 | $6.36 \times 10^{-39}$ | 1867 |
| «Age is not a barrier”<br>screening-test | Risk of malnutrition           | 0.301 | $6.67 \times 10^{-33}$ | 1704 |
| «Age is not a barrier”<br>screening-test | Frailty                        | 0.261 | $4.36 \times 10^{-26}$ | 1871 |
| «Age is not a barrier”<br>screening-test | IADL                           | 0.242 | $4.38 \times 10^{-24}$ | 1841 |
| «Age is not a barrier”<br>screening-test | Dementia                       | 0.242 | $1.26 \times 10^{-21}$ | 1784 |
| «Age is not a barrier”<br>screening-test | Chronic pain                   | 0.224 | $1.01 \times 10^{-20}$ | 1868 |
| «Age is not a barrier”<br>screening-test | Anxiety disorder               | 0.264 | $1.35 \times 10^{-20}$ | 1300 |
| «Age is not a barrier”<br>screening-test | Sensory deficit                | 0.214 | $7.48 \times 10^{-20}$ | 1868 |
| «Age is not a barrier”<br>screening-test | Frontal lobe dysfunction       | 0.159 | $3.13 \times 10^{-10}$ | 1814 |
| «Age is not a barrier”<br>screening-test | Sarcopenia                     | 0.092 | $3.88 \times 10^{-04}$ | 1656 |
| sleeping pattern                         | Chronic pain                   | 0.316 | $2.93 \times 10^{-27}$ | 1207 |
| sleeping pattern                         | Depression                     | 0.316 | $5.83 \times 10^{-27}$ | 1191 |
| sleeping pattern                         | Anxiety disorder               | 0.256 | $1.83 \times 10^{-16}$ | 1118 |
| sleeping pattern                         | Risk of falls                  | 0.223 | $2.81 \times 10^{-13}$ | 1207 |
| sleeping pattern                         | Urinary or faecal incontinence | 0.201 | $1.04 \times 10^{-10}$ | 1206 |
| sleeping pattern                         | Frontal lobe dysfunction       | 0.115 | $8.43 \times 10^{-10}$ | 1185 |
| sleeping pattern                         | Barthel index                  | 0.183 | $3.46 \times 10^{-08}$ | 1189 |
| sleeping pattern                         | Orthostatic hypotension        | 0.068 | $5.31 \times 10^{-05}$ | 882  |

|                                                 |                                |        |                         |      |
|-------------------------------------------------|--------------------------------|--------|-------------------------|------|
| sleeping pattern                                | Polypragmasia                  | 0.112  | $2.65 \times 10^{-04}$  | 1166 |
| SPPB                                            | Frailty                        | -0.717 | $6.07 \times 10^{-288}$ | 1889 |
| SPPB                                            | Barthel index                  | -0.38  | $4.57 \times 10^{-57}$  | 1843 |
| SPPB                                            | Dementia                       | -0.37  | $1.14 \times 10^{-52}$  | 1795 |
| SPPB                                            | Urinary or faecal incontinence | -0.296 | $4.20 \times 10^{-35}$  | 1886 |
| SPPB                                            | Frontal lobe dysfunction       | -0.292 | $3.34 \times 10^{-34}$  | 1813 |
| SPPB                                            | Depression                     | -0.278 | $1.93 \times 10^{-29}$  | 1826 |
| SPPB                                            | IADL                           | -0.263 | $2.23 \times 10^{-28}$  | 1855 |
| SPPB                                            | Risk of malnutrition           | -0.279 | $2.75 \times 10^{-26}$  | 1665 |
| SPPB                                            | Chronic pain                   | -0.177 | $1.57 \times 10^{-12}$  | 1838 |
| SPPB                                            | Risk of falls                  | -0.177 | $4.30 \times 10^{-12}$  | 1862 |
| SPPB                                            | Sarcopenia                     | -0.166 | $7.21 \times 10^{-11}$  | 1623 |
| SPPB                                            | Orthostatic hypotension        | -0.118 | $1.19 \times 10^{-05}$  | 1260 |
| SPPB                                            | Anxiety disorder               | -0.118 | $1.46 \times 10^{-04}$  | 1282 |
| thyroid diseases                                | Polypragmasia                  | 0.151  | $7.18 \times 10^{-11}$  | 1818 |
| thyroid diseases                                | Dementia                       | -0.094 | $1.02 \times 10^{-05}$  | 1872 |
| thyroid diseases                                | Frontal lobe dysfunction       | -0.099 | $1.03 \times 10^{-05}$  | 1901 |
| urinary incontinence on the way to the bathroom | Urinary or faecal incontinence | 0.859  | $1.71 \times 10^{-142}$ | 491  |
|                                                 | Barthel index                  | 0.38   | $7.27 \times 10^{-17}$  | 482  |
|                                                 | Frailty                        | 0.205  | $4.86 \times 10^{-05}$  | 492  |
|                                                 | Sarcopenia                     | 0.203  | $1.71 \times 10^{-04}$  | 351  |
|                                                 | Urinary or faecal incontinence | 0.761  | $4.54 \times 10^{-92}$  | 494  |

|                                                                         |                                |        |                        |      |
|-------------------------------------------------------------------------|--------------------------------|--------|------------------------|------|
| urinary incontinence while coughing, laughing, sneezing, taking weights | Barthel index                  | 0.336  | $1.37 \times 10^{-12}$ | 485  |
|                                                                         | IADL                           | 0.238  | $2.90 \times 10^{-07}$ | 481  |
|                                                                         | Sarcopenia                     | 0.25   | $2.52 \times 10^{-06}$ | 351  |
|                                                                         | Frailty                        | 0.247  | $4.44 \times 10^{-06}$ | 495  |
|                                                                         | Frontal lobe dysfunction       | 0.2    | $1.07 \times 10^{-04}$ | 467  |
| use of the Internet                                                     | IADL                           | -0.179 | $3.02 \times 10^{-14}$ | 1949 |
| use of the Internet                                                     | Barthel index                  | -0.162 | $2.11 \times 10^{-10}$ | 1935 |
| use of the Internet                                                     | Dementia                       | -0.139 | $1.22 \times 10^{-07}$ | 1881 |
| use of the Internet                                                     | Risk of malnutrition           | -0.129 | $3.94 \times 10^{-06}$ | 1752 |
| use of the Internet                                                     | Frontal lobe dysfunction       | -0.108 | $1.89 \times 10^{-05}$ | 1909 |
| use of the Internet                                                     | Sarcopenia                     | -0.097 | $7.61 \times 10^{-05}$ | 1704 |
| use of the Internet                                                     | Sensory deficit                | -0.092 | $1.36 \times 10^{-04}$ | 1944 |
| vision with glasses                                                     | Sensory deficit                | 0.206  | $2.32 \times 10^{-19}$ | 1950 |
| vision with glasses                                                     | Anxiety disorder               | 0.129  | $1.61 \times 10^{-06}$ | 1320 |
| vision with glasses                                                     | Chronic pain                   | 0.095  | $2.46 \times 10^{-05}$ | 1937 |
| vision with glasses                                                     | Urinary or faecal incontinence | 0.08   | $2.07 \times 10^{-04}$ | 1946 |
| vision with glasses                                                     | Depression                     | 0.09   | $2.24 \times 10^{-04}$ | 1878 |
| vision with glasses                                                     | Barthel index                  | 0.075  | $4.08 \times 10^{-04}$ | 1901 |
| vision without glasses                                                  | Sensory deficit                | 0.409  | $7.15 \times 10^{-78}$ | 1959 |
| vision without glasses                                                  | Barthel index                  | 0.153  | $2.73 \times 10^{-11}$ | 1909 |
| vision without glasses                                                  | Risk of malnutrition           | 0.161  | $1.15 \times 10^{-10}$ | 1744 |
| vision without glasses                                                  | Sarcopenia                     | 0.146  | $7.18 \times 10^{-09}$ | 1710 |

|                        |                                |        |                        |      |
|------------------------|--------------------------------|--------|------------------------|------|
| vision without glasses | Urinary or faecal incontinence | 0.129  | $1.38 \times 10^{-08}$ | 1954 |
| vision without glasses | IADL                           | 0.132  | $3.19 \times 10^{-08}$ | 1919 |
| vision without glasses | Dementia                       | 0.125  | $8.91 \times 10^{-07}$ | 1853 |
| vision without glasses | Depression                     | 0.117  | $3.38 \times 10^{-06}$ | 1886 |
| going visiting         | Frontal lobe dysfunction       | -0.427 | $4.02 \times 10^{-81}$ | 1894 |
| going visiting         | Depression                     | -0.291 | $3.01 \times 10^{-36}$ | 1899 |
| going visiting         | Dementia                       | -0.201 | $2.41 \times 10^{-16}$ | 1864 |
| going visiting         | Chronic pain                   | -0.178 | $9.62 \times 10^{-15}$ | 1928 |
| going visiting         | Orthostatic hypotension        | -0.205 | $1.78 \times 10^{-13}$ | 1308 |
| going visiting         | Risk of falls                  | -0.172 | $2.91 \times 10^{-13}$ | 1946 |
| going visiting         | Anxiety disorder               | -0.185 | $3.00 \times 10^{-11}$ | 1318 |
| going visiting         | IADL                           | -0.115 | $2.23 \times 10^{-06}$ | 1930 |
| going visiting         | Barthel index                  | -0.113 | $1.02 \times 10^{-05}$ | 1917 |
| going visiting         | Risk of malnutrition           | -0.108 | $3.76 \times 10^{-05}$ | 1742 |
| going visiting         | Frailty                        | -0.108 | $3.78 \times 10^{-05}$ | 1964 |
| going visiting         | Sarcopenia                     | 0.079  | $2.51 \times 10^{-04}$ | 1697 |
| waist circumference    | Chronic pain                   | 0.125  | $1.41 \times 10^{-08}$ | 1643 |
| waist circumference    | Risk of malnutrition           | -0.14  | $2.56 \times 10^{-06}$ | 1538 |
| waist circumference    | Sarcopenia                     | -0.102 | $1.16 \times 10^{-04}$ | 1518 |
| weight                 | Polypragmasia                  | 0.12   | $2.61 \times 10^{-07}$ | 1713 |
| weight                 | Risk of malnutrition           | -0.135 | $1.74 \times 10^{-05}$ | 1765 |
| weight                 | Frontal lobe dysfunction       | -0.099 | $5.48 \times 10^{-04}$ | 1808 |

**Table S4.** Association between GSs, AADs, education and type of work.

| Education                                                          |                            |                             |                            |                            |
|--------------------------------------------------------------------|----------------------------|-----------------------------|----------------------------|----------------------------|
|                                                                    | GSs                        |                             |                            | Presence of AADs           |
|                                                                    | Sarcopenia                 | Dependence in IADL          | Polypragmasia              |                            |
| Primary education p-value (OR)                                     | 0.01(0.52)                 | 0.48 (0.7)                  | $3.81 \cdot 10^{-4}(0.51)$ | 1 (1.14)                   |
| Middle school p-value (OR)                                         | 0.8 (0.93)                 | 0.67 (1.26)                 | 0.37 (1.16)                | 0.66 (1.3)                 |
| High school p-value (OR)                                           | 0.01 (1.85)                | 0.84 (1.09)                 | 0.03 (1.4)                 | 0.53 (0.74)                |
| Vocational education p-value (OR)                                  | $5.54 \cdot 10^{-4}(0.52)$ | $1.13 \cdot 10^{-3}(0.39)$  | 0.01 (1.42)                | 1 (1.1)                    |
| High school and vocational education p-value (OR)                  | 0.86 (0.94)                | 0.76 (0.95)                 | 0.19 (1.4)                 | 0.5 (2.58)                 |
| Unfinished higher education p-value (OR)                           | 0.2 (0.52)                 | -*                          | 0.39 (0.64)                | 0.04 (0.22)                |
| Higher education p-value (OR)                                      | $6.72 \cdot 10^{-4}(0.59)$ | $1.68 \cdot 10^{-3}(0.45)$  | 0.02 (1.3)                 | $6.5 \cdot 10^{-3}(0.49)$  |
| Doctoral degree p-value (OR)                                       | $7.83 \cdot 10^{-4}(0.32)$ | $2.97 \cdot 10^{-5}(0.16)$  | 0.13 (1.53)                | 0.02 (0.29)                |
| P-value                                                            | $1.83 \cdot 10^{-4}$       | $4.11 \cdot 10^{-4}$        | $1.11 \cdot 10^{-3}$       | $5.9 \cdot 10^{-4}$        |
| Cohort size                                                        | 1692                       | 1912                        | 1775                       | 1945                       |
| Job type                                                           |                            |                             |                            |                            |
|                                                                    | GSs                        |                             |                            | Presence of AADs           |
|                                                                    | Sarcopenia                 | Cognitive impairment        | Dependence in IADL         |                            |
| Intellectually demanding and physically intensive job p-value (OR) | 0.01 (1.41)                | 0.04 (0.81)                 | $1.16 \cdot 10^{-4}(2.52)$ | $8.1 \cdot 10^{-3}(2.08)$  |
| Intellectually demanding p-value (OR)                              | $3.75 \cdot 10^{-5}(0.59)$ | $3.72 \cdot 10^{-7}(0.61)$  | $1.69 \cdot 10^{-6}(0.39)$ | $2.91 \cdot 10^{-7}(0.3)$  |
| physically intensive job p-value (OR)                              | 0.04 (1.39)                | $3.76 \cdot 10^{-16}(2.48)$ | 0.15 (1.44)                | $1.16 \cdot 10^{-3}(2.88)$ |
| P-value                                                            | $1.44 \cdot 10^{-4}$       | $6.23 \cdot 10^{-16}$       | $4.76 \cdot 10^{-5}$       | $6.86 \cdot 10^{-7}$       |
| Cohort size                                                        | 1674                       | 1827                        | 1912                       | 1913                       |

Note: \* - No participant had both incomplete college degrees and independence in IADL, therefore a comprehensive analysis was impossible. OR – odds ratio; OR - odds ratio.

**Table S5.** Associations between the presence of aging-associated diseases and risk factors.



| Factor                                               | Correlation coefficient | p-value                | n    |
|------------------------------------------------------|-------------------------|------------------------|------|
| Long-term factors (p-value <0.01)                    |                         |                        |      |
| Family history of cognitive decline (memory loss)    | 0.063                   | $7.53 \times 10^{-03}$ | 1796 |
| Medium-term factors (p-value < $1.7 \cdot 10^{-3}$ ) |                         |                        |      |
| education                                            | -0.077                  | $5.90 \times 10^{-04}$ | 1945 |
| type of job                                          | -0.112                  | $6.86 \times 10^{-07}$ | 1913 |
| grip strength                                        | -0.137                  | $7.85 \times 10^{-09}$ | 1790 |
| disability                                           | 0.15                    | $3.38 \times 10^{-11}$ | 1936 |
| Short-term factors (p-value < $5.6 \cdot 10^{-4}$ )  |                         |                        |      |
| Alzheimer's disease                                  | 0.11                    | $1.87 \times 10^{-05}$ | 1524 |
| brachiocephalic artery atherosclerosis               | 0.079                   | $4.25 \times 10^{-04}$ | 1961 |
| Charlson comorbidity index                           | 0.205                   | $1.40 \times 10^{-19}$ | 1905 |
| chronic heart failure                                | 0.095                   | $1.87 \times 10^{-05}$ | 1993 |
| chronic obstructive pulmonary disease                | 0.084                   | $1.59 \times 10^{-04}$ | 1981 |
| clock-drawing test                                   | -0.189                  | $1.31 \times 10^{-13}$ | 1527 |
| communication by phone/Internet                      | -0.119                  | $1.72 \times 10^{-07}$ | 1972 |
| CVD in family history                                | 0.314                   | $1.95 \times 10^{-47}$ | 1988 |
| diabetes type 2                                      | 0.08                    | $3.69 \times 10^{-04}$ | 1984 |
| frontal lobe disorder                                | 0.268                   | $1.83 \times 10^{-30}$ | 1801 |
| GDS-5                                                | 0.093                   | $7.99 \times 10^{-05}$ | 1835 |
| going out                                            | -0.099                  | $1.02 \times 10^{-05}$ | 1963 |
| hippocampus dysfunction                              | 0.141                   | $1.64 \times 10^{-08}$ | 1649 |

|                                        |        |                        |      |
|----------------------------------------|--------|------------------------|------|
| hobby                                  | -0.134 | $5.28 \times 10^{-07}$ | 1401 |
| duration of walks                      | -0.106 | $2.59 \times 10^{-06}$ | 1975 |
| memory problems                        | 0.082  | $2.62 \times 10^{-04}$ | 1953 |
| MMSE                                   | -0.196 | $7.66 \times 10^{-18}$ | 1901 |
| number of aging-associated diseases    | 0.346  | $1.74 \times 10^{-43}$ | 1500 |
| physical activity                      | -0.107 | $2.12 \times 10^{-06}$ | 1975 |
| physical activity limitation           | 0.1    | $1.30 \times 10^{-05}$ | 1925 |
| self-assessment of the quality of life | -0.12  | $9.21 \times 10^{-07}$ | 1712 |
| “Age is not a barrier” screening-test  | 0.17   | $1.95 \times 10^{-13}$ | 1868 |
| SPPB                                   | -0.168 | $2.00 \times 10^{-13}$ | 1884 |
| use of the Internet                    | -0.138 | $9.23 \times 10^{-10}$ | 1979 |
| vision without glasses                 | 0.109  | $2.01 \times 10^{-06}$ | 1953 |
